# Supplementary material
Source: PubMed Central journal article supplement (PMC4296320)
Supplement: NIHMS636985-supplement-supplement_1.pdf [file NIHMS636985-supplement-supplement_1.pdf]

## Appendix

Table SI. Gene expression at least 4-fold higher in adult T-cell leukemia-lymphoma specimens than in Jurkat cells.

| Arrayed feature                                                                                                                                              | Expression relative to Jurkat cell line* |
|--------------------------------------------------------------------------------------------------------------------------------------------------------------|------------------------------------------|
| 330370    HBB    hemoglobin, beta    Hs.155376                                                                                                               | 7.67                                     |
| 116933    LYZ    lysozyme (renal amyloidosis)    Hs.234734                                                                                                   | 6.99                                     |
| 120321    MGC17330    hypothetical protein MGC17330    Hs.26670                                                                                              | 6.54                                     |
| 311493    CD28    CD28 antigen (Tp44)    Hs.1987                                                                                                             | 6.41                                     |
| 114151    HLA-DRB5    major histocompatibility complex, class II, DR beta 5    Hs.352392                                                                     | 6.09                                     |
| 119990    S100A11    S100 calcium binding protein A11 (calgizzarin)    Hs.417004                                                                             | 5.97                                     |
| 101316    HLA-DRB3    major histocompatibility complex, class II, DR beta 3    Hs.308026                                                                     | 5.80                                     |
| 111765    IGKC    **immunoglobulin kappa constant    Hs.406565                                                                                               | 5.75                                     |
| 99469    S100A8    S100 calcium binding protein A8 (calgranulin A)    Hs.416073                                                                              | 5.70                                     |
| 331082    LGALS1    lectin, galactoside-binding, soluble, 1 (galectin 1)    Hs.382367                                                                        | 5.64                                     |
| 108180    ISG20    interferon stimulated gene 20 kDa    Hs.183487                                                                                            | 5.58                                     |
| 107910    HLA-DRB1    major histocompatibility complex, class II, DR beta 1    Hs.375570                                                                     | 5.05                                     |
| 308487    ID2    inhibitor of DNA binding 2, dominant negative helix-loop-helix protein    Hs.180919                                                         | 4.94                                     |
| 108639    CTLA4    cytotoxic T-lymphocyte-associated protein 4    Hs.247824                                                                                  | 4.89                                     |
| 102363    TYROBP    TYRO protein tyrosine kinase binding protein    Hs.9963                                                                                  | 4.83                                     |
| 112406    HBA2    **hemoglobin, alpha 2    Hs.347939                                                                                                         | 4.82                                     |
| 161366    SERPINB1    serine (or cysteine) proteinase inhibitor, clade B (ovalbumin), member 1    Hs.183583                                                  | 4.74                                     |
| 106670    HLA-DQB1    major histocompatibility complex, class II, DQ beta 1    Hs.73931                                                                      | 4.71                                     |
| 99062    OAS2    2'- 5'-oligoadenylate synthetase 2, 69/71 kDa    Hs.432659                                                                                  | 4.63                                     |
| 119872    P2RY5    purinergic receptor P2Y, G-protein coupled, 5    Hs.189999                                                                                | 4.62                                     |
| 110632       <i>Homo sapiens</i> , Similar to nuclear localization signals binding protein 1, clone MGC:21810 IMAGE:4183576, mRNA, complete cds    Hs.244624 | 4.58                                     |
| 107000    CSPG2    chondroitin sulfate proteoglycan 2 (versican)    Hs.81800                                                                                 | 4.54                                     |
| 100967    KCNN4    potassium intermediate/small conductance calcium-activated channel, subfamily N, member 4    Hs.10082                                     | 4.46                                     |
| 314421    HLA-C    major histocompatibility complex, class I, C    Hs.277477                                                                                 | 4.42                                     |
| 102967    CSPG2    chondroitin sulfate proteoglycan 2 (versican)    Hs.81800                                                                                 | 4.37                                     |
| 102734    MGC27165    hypothetical protein MGC27165    Hs.366                                                                                                | 4.37                                     |
| 108645    COPEB    core promoter element binding protein    Hs.285313                                                                                        | 4.34                                     |
| 110694    MGC27165    hypothetical protein MGC27165    Hs.366                                                                                                | 4.32                                     |
| 318245    ID2    inhibitor of DNA binding 2, dominant negative helix-loop-helix protein    Hs.180919                                                         | 4.29                                     |
| 161545    EDG1    endothelial differentiation, sphingolipid G-protein-coupled receptor, 1    Hs.154210                                                       | 4.28                                     |
| 318902    ChGn    chondroitin beta1,4N-acetylgalactosaminyltransferase    Hs.11260                                                                           | 4.26                                     |
| 108901    IGKC    immunoglobulin kappa constant    Hs.406565                                                                                                 | 4.24                                     |
| 222669    JAK3    Janus kinase 3 (a protein tyrosine kinase, leukocyte)    Hs.99877                                                                          | 4.23                                     |
| 102486    C14orf47    chromosome 14 open reading frame 47    Hs.57787                                                                                        | 4.23                                     |
| 226481    TOSO    regulator of Fas-induced apoptosis    Hs.58831                                                                                             | 4.21                                     |
| 161106    MGC27165    hypothetical protein MGC27165    Hs.366                                                                                                | 4.16                                     |
| 115147    SOCS3    suppressor of cytokine signaling 3    Hs.345728                                                                                           | 4.15                                     |
| 115200    LYN    v-yes-1 Yamaguchi sarcoma viral related oncogene homolog    Hs.80887                                                                        | 4.04                                     |
| 110533    RAB31    RAB31, member RAS oncogene family    Hs.223025                                                                                            | 4.01                                     |
| 113390       **Homo sapiens cDNA FLJ37940 fis, clone CTONG2007779.    Hs.95872                                                                               | 4.00                                     |
| 116761    RARRES3    retinoic acid receptor responder (tazarotene induced) 3    Hs.17466                                                                     | 3.98                                     |
| 161053    TNFRSF7    tumor necrosis factor receptor superfamily, member 7    Hs.355307                                                                       | 3.97                                     |
| 115297    FCER1G    Fc fragment of IgE, high affinity I, receptor for; gamma polypeptide    Hs.433300                                                        | 3.96                                     |
| 108175    ARHGEF5    Rho guanine nucleotide exchange factor (GEF) 5    Hs.334                                                                                | 3.96                                     |
| 223997    APOL3    apolipoprotein L, 3    Hs.241535                                                                                                          | 3.95                                     |
| 331305    IGHM    immunoglobulin heavy constant mu    Hs.153261                                                                                              | 3.93                                     |
| 100816    BTG1    B-cell translocation gene 1, anti-proliferative    Hs.77054                                                                                | 3.85                                     |
| 307195    LTB    lymphotoxin beta (TNF superfamily, member 3)    Hs.890                                                                                      | 3.82                                     |
| 309992                                                                                                                                                       | 3.80                                     |
| 239268    RUNX3    runt-related transcription factor 3    Hs.170019                                                                                          | 3.79                                     |
| 317969       ESTs    Hs.296276                                                                                                                               | 3.79                                     |
| 220964    GNG11    guanine nucleotide binding protein (G protein), gamma 11    Hs.83381                                                                      | 3.71                                     |
| 99380    CRIP1    cysteine-rich protein 1 (intestinal)    Hs.423190                                                                                          | 3.71                                     |

(continued)

Table SI. (Continued).

| Arrayed feature                                                                                                                              | Expression relative to Jurkat cell line* |
|----------------------------------------------------------------------------------------------------------------------------------------------|------------------------------------------|
| 113479    TNFSF7    tumor necrosis factor (ligand) superfamily, member 7    Hs.99899                                                         | 3.66                                     |
| 309190    SAT    spermidine/spermine N1-acetyltransferase    Hs.28491                                                                        | 3.65                                     |
| 101875       ESTs, Weakly similar to S21348 probable pol polyprotein-related protein 4 - rat [ <i>R. norvegicus</i> ]    Hs.432827           | 3.64                                     |
| 307507    MALT1    mucosa associated lymphoid tissue lymphoma translocation gene 1    Hs.180566                                              | 3.64                                     |
| 114205       <i>Homo sapiens</i> , clone IMAGE:3881549, mRNA    Hs.346735                                                                    | 3.62                                     |
| 312080    LLT1    lectin-like NK cell receptor    Hs.136748                                                                                  | 3.60                                     |
| 224392    DAF    decay accelerating factor for complement (CD55, Cromer blood group system)    Hs.1369                                       | 3.57                                     |
| 102912       ESTs    Hs.97872                                                                                                                | 3.54                                     |
| 118393    IL10RA    interleukin 10 receptor, alpha    Hs.327                                                                                 | 3.54                                     |
| 104323    SLC2A14,    **solute carrier family 2 (facilitated glucose transporter), member 14    Hs.401274                                    | 3.50                                     |
| 103931       ESTs    Hs.15200                                                                                                                | 3.50                                     |
| 110556    MYO1E    myosin IE    Hs.82251                                                                                                     | 3.48                                     |
| 114548    BASP1    brain abundant, membrane attached signal protein 1    Hs.79516                                                            | 3.45                                     |
| 226185       <i>Homo sapiens</i> , clone IMAGE:4766144, mRNA    Hs.72080                                                                     | 3.41                                     |
| 316875       ESTs    Hs.444602                                                                                                               | 3.41                                     |
| 112735    JUN    v-jun sarcoma virus 17 oncogene homolog (avian)    Hs.78465                                                                 | 3.40                                     |
| 110605    B2M    beta-2-microglobulin    Hs.48516                                                                                            | 3.39                                     |
| 104520    IGJ    immunoglobulin J polypeptide, linker protein for immunoglobulin alpha and mu polypeptides    Hs.76325                       | 3.35                                     |
| 330976       <i>Homo sapiens</i> , clone IMAGE:5533204, mRNA    Hs.235936                                                                    | 3.35                                     |
| 107005    HLA-DQB1    major histocompatibility complex, class II, DQ beta 1    Hs.73931                                                      | 3.35                                     |
| 110541                                                                                                                                       | 3.34                                     |
| 117954    GNLY    granulysin    Hs.105806                                                                                                    | 3.34                                     |
| 307925       ESTs, Weakly similar to PRO0478 protein [ <i>Homo sapiens</i> ] [ <i>H. sapiens</i> ]    Hs.175437                              | 3.32                                     |
| 330383    KLRC2    killer cell lectin-like receptor subfamily C, member 2    Hs.177605                                                       | 3.32                                     |
| 184461    ANK1    ankyrin 1, erythrocytic    Hs.183805                                                                                       | 3.30                                     |
| 191208                                                                                                                                       | 3.29                                     |
| 309960    KIAA0053    KIAA0053 gene product    Hs.1528                                                                                       | 3.29                                     |
| 221560    UNC84B    unc-84 homolog A ( <i>C. elegans</i> )    Hs.406612                                                                      | 3.26                                     |
| 106809       <i>Homo sapiens</i> cDNA: FLJ21930 fis, clone HEP04301, highly similar to HSU90916 Human clone 23815 mRNA sequence.    Hs.82845 | 3.24                                     |
| 331223    CST7    cystatin F (leukocystatin)    Hs.143212                                                                                    | 3.24                                     |
| 107517    CYLD    cylindromatosis (turban tumor syndrome)    Hs.18827                                                                        | 3.24                                     |
| 101256    PSCDBP    pleckstrin homology, Sec7 and coiled/coil domains, binding protein    Hs.270                                             | 3.24                                     |
| 100368    GBP1    guanylate binding protein 1, interferon-inducible, 67 kDa    Hs.62661                                                      | 3.24                                     |
| 106240    TRIM22    tripartite motif-containing 22    Hs.318501                                                                              | 3.23                                     |
| 110188       ESTs, Highly similar to Y379_HUMAN Hypothetical protein KIAA0379 [ <i>H. sapiens</i> ]    Hs.40173                              | 3.22                                     |
| 312563       <i>Homo sapiens</i> , Similar to olfactory receptor, family 2, subfamily A, member 4, clone IMAGE:4424116, mRNA    Hs.133517    | 3.21                                     |
| 309527    CDA    cytidine deaminase    Hs.72924                                                                                              | 3.21                                     |
| 226697       <i>Homo sapiens</i> mRNA; cDNA DKFZp586A0618 (from clone DKFZp586A0618)    Hs.349755                                            | 3.19                                     |
| 317666    DDX17    DEAD/H (Asp-Glu-Ala-Asp/His) box polypeptide 17, 72kDa    Hs.349121                                                       | 3.16                                     |
| 98611    ZNF187    zinc finger protein 187    Hs.237786                                                                                      | 3.15                                     |
| 115150    SAT    spermidine/spermine N1-acetyltransferase    Hs.28491                                                                        | 3.14                                     |
| 223574    IGSF4    immunoglobulin superfamily, member 4    Hs.70337                                                                          | 3.12                                     |
| 112895    OAS2    2'- 5'-oligoadenylate synthetase 2, 69/71 kDa    Hs.432659                                                                 | 3.11                                     |
| 99827    GJB1    gap junction protein, beta 1, 32kDa (connexin 32, Charcot-Marie-Tooth neuropathy, X-linked)    Hs.333303                    | 3.08                                     |
| 119885    IGKC    **immunoglobulin kappa constant    Hs.406565                                                                               | 3.08                                     |
| 102629    MIR    myosin regulatory light chain interacting protein    Hs.20072                                                               | 3.07                                     |
| 319569    ADAM19    a disintegrin and metalloproteinase domain 19 (meltrin beta)    Hs.278679                                                | 3.07                                     |
| 178262    JUNB    jun B proto-oncogene    Hs.400124                                                                                          | 3.06                                     |
| 100666    C1S    complement component 1, s subcomponent    Hs.434029                                                                         | 3.06                                     |
| 307412    PTPRM    protein tyrosine phosphatase, receptor type, M    Hs.154151                                                               | 3.05                                     |

(continued)

Table SI. (Continued).

| Arrayed feature                                                                                                                  | Expression relative to Jurkat cell line* |
|----------------------------------------------------------------------------------------------------------------------------------|------------------------------------------|
| 112014    IL2RB    interleukin 2 receptor, beta    Hs.75596                                                                      | 3.04                                     |
| 105812    IRF7    interferon regulatory factor 7    Hs.166120                                                                    | 3.04                                     |
| 330877    OAS2    2'- 5'-oligoadenylate synthetase 2, 69/71kDa    Hs.432659                                                      | 3.01                                     |
| 113615    ZNF24    zinc finger protein 24 (KOX 17)    Hs.183593                                                                  | 3.00                                     |
| 316377    GBP4    guanylate binding protein 4    Hs.240849                                                                       | 2.97                                     |
| 312148    OAS3    2'- 5'-oligoadenylate synthetase 3, 100 kDa    Hs.56009                                                        | 2.96                                     |
| 104934    SERPINB1    serine (or cysteine) proteinase inhibitor, clade B (ovalbumin), member 1    Hs.183583                      | 2.93                                     |
| 310861       ESTs    Hs.169054                                                                                                   | 2.92                                     |
| 104093    LSP1    lymphocyte-specific protein 1    Hs.56729                                                                      | 2.90                                     |
| 178264    IFITM3    interferon induced transmembrane protein 3 (1-8U)    Hs.433414                                               | 2.89                                     |
| 330485    PSTPIP1    proline-serine-threonine phosphatase interacting protein 1    Hs.129758                                     | 2.87                                     |
| 224226    LOC91663    hypothetical protein BC013995    Hs.380906                                                                 | 2.85                                     |
| 115703    IRF7    interferon regulatory factor 7    Hs.166120                                                                    | 2.85                                     |
| 119893    SP100    nuclear antigen Sp100    Hs.77617                                                                             | 2.72                                     |
| 223329       ESTs    Hs.431083                                                                                                   | 2.70                                     |
| 111414       ESTs    Hs.119563                                                                                                   | 2.68                                     |
| 315157       ESTs, Moderately similar to hypothetical protein MGC4027 [ <i>Homo sapiens</i> ] [ <i>H. sapiens</i> ]    Hs.126232 | 2.67                                     |
| 101364    FGFR1    fibroblast growth factor receptor 1 (fms-related tyrosine kinase 2, Pfeiffer syndrome)    Hs.748              | 2.63                                     |
| 112250    TOB1    transducer of ERBB2, 1    Hs.178137                                                                            | 2.46                                     |
| 112885                                                                                                                           | 2.36                                     |

\*Values shown are based on log-2 scale.

Table SII. Gene expression at least 4-fold lower in adult T-cell leukemia-lymphoma specimens than in Jurkat cells.

| Arrayed feature                                                                                | Expression relative to Jurkat cell line* |
|------------------------------------------------------------------------------------------------|------------------------------------------|
| 330504    TRGV9    T cell receptor gamma variable 9    Hs.112259                               | -4.68                                    |
| 107272       <i>Homo sapiens</i> , clone IMAGE:4690669, mRNA    Hs.49265                       | -4.69                                    |
| 111956    NUCB2    nucleobindin 2    Hs.3164                                                   | -4.72                                    |
| 105129    TMEMPAI    transmembrane, prostate androgen induced RNA    Hs.83883                  | -4.79                                    |
| 109425    TRGV9    T cell receptor gamma variable 9    Hs.112259                               | -4.84                                    |
| 309831    D2S448    Melanoma associated gene    Hs.118893                                      | -5.24                                    |
| 105870    ALDH1A2    aldehyde dehydrogenase 1 family, member A2    Hs.95197                    | -5.83                                    |
| 308729    TTK    TTK protein kinase    Hs.169840                                               | -3.40                                    |
| 319981    LOC93081    hypothetical protein BC015148    Hs.13413                                | -3.45                                    |
| 331359    ESPL1    extra spindle poles like 1 ( <i>S. cerevisiae</i> )    Hs.153479            | -3.50                                    |
| 100448       ** <i>Homo sapiens</i> , clone IMAGE:4655360, mRNA    Hs.325015                   | -3.50                                    |
| 330906    KIF4A    kinesin family member 4A    Hs.279766                                       | -3.52                                    |
| 117645    NGFRAP1    nerve growth factor receptor (TNFRSF16) associated protein 1    Hs.381039 | -3.53                                    |
| 331160    KIAA0992    palladin    Hs.194431                                                    | -3.53                                    |
| 308076    SLIT1    slit homolog 1 ( <i>Drosophila</i> )    Hs.133466                           | -3.58                                    |
| 119100    CCNA2    cyclin A2    Hs.85137                                                       | -3.70                                    |
| 248886                                                                                         | -3.75                                    |
| 309620    CD1B    CD1B antigen, b polypeptide    Hs.1310                                       | -4.00                                    |
| 311271    GSTP1    glutathione S-transferase pi    Hs.226795                                   | -4.00                                    |
| 220192    JAM3    junctional adhesion molecule 3    Hs.334703                                  | -4.31                                    |
| 226414    ASRGL1    asparaginase like 1    Hs.7331                                             | -4.37                                    |
| 98358    NKX3-1    NK3 transcription factor related, locus 1 ( <i>Drosophila</i> )    Hs.55999 | -4.59                                    |
| 114866    FLJ20186    hypothetical protein FLJ20186    Hs.62771                                | -3.21                                    |
| 331303    CDT1    DNA replication factor    Hs.122908                                          | -3.22                                    |
| 309851    ASRGL1    asparaginase like 1    Hs.7331                                             | -3.26                                    |

(continued)

Table SII. (Continued).

| Arrayed feature                                                                                                                 | Expression relative to Jurkat cell line* |
|---------------------------------------------------------------------------------------------------------------------------------|------------------------------------------|
| 104748    PELI2    pellino homolog 2 ( <i>Drosophila</i> )    Hs.44038                                                          | -3.29                                    |
| 117274    NRLN1    likely ortholog of mouse neuralin 1    Hs.82223                                                              | -3.32                                    |
| 226061    PCOLCE2    procollagen C-endopeptidase enhancer 2    Hs.8944                                                          | -3.34                                    |
| 226975    LOC81023    hypothetical protein AF301222    Hs.335951                                                                | -3.36                                    |
| 223918    FLJ25157    hypothetical protein FLJ25157    Hs.108323                                                                | -3.36                                    |
| 116625                                                                                                                          | -3.17                                    |
| 101527       <i>Homo sapiens</i> clone IMAGE:120162 mRNA sequence    Hs.406351                                                  | -3.17                                    |
| 107468    STEAP    six transmembrane epithelial antigen of the prostate    Hs.61635                                             | -2.96                                    |
| 311092    MGC4248    hypothetical protein MGC4248    Hs.334437                                                                  | -3.01                                    |
| 106982    RAMP    RA-regulated nuclear matrix-associated protein    Hs.126774                                                   | -3.02                                    |
| 103951       ESTs    Hs.421701                                                                                                  | -3.03                                    |
| 313420    BRI3BP    BRI3 binding protein    Hs.131886                                                                           | -3.08                                    |
| 317206    RAGD    Rag D protein    Hs.238679                                                                                    | -2.90                                    |
| 223114    RFC3    replication factor C (activator 1) 3, 38kDa    Hs.115474                                                      | -2.87                                    |
| 184450    SCD    stearoyl-CoA desaturase (delta-9-desaturase)    Hs.119597                                                      | -2.82                                    |
| 111873    DLG7    discs, large homolog 7 ( <i>Drosophila</i> )    Hs.77695                                                      | -2.68                                    |
| 109247    TRGV9    **T cell receptor gamma variable 9    Hs.112259                                                              | -2.68                                    |
| 223334    CCNB2    cyclin B2    Hs.194698                                                                                       | -2.70                                    |
| 114167    KIF9    kinesin family member 9    Hs.105187                                                                          | -2.73                                    |
| 100912       Human full-length cDNA 5-PRIME end of clone CS0DK007YB08 of HeLa cells of <i>Homo sapiens</i> (human)    Hs.406349 | -2.76                                    |
| 113026       ESTs    Hs.404723                                                                                                  | -2.77                                    |
| 117992    KCNH2    potassium voltage-gated channel, subfamily H (eag-related), member 2    Hs.188021                            | -2.61                                    |
| 225987    SLC7A11    solute carrier family 7, (cationic amino acid transporter, y+ system) member 11    Hs.6682                 | -2.40                                    |
| 185871    LOC148418    hypothetical protein LOC148418    Hs.105069                                                              | -2.38                                    |
| 104835    MYO1B    myosin IB    Hs.121576                                                                                       | -2.35                                    |

\*Values shown are based on log-2 scale.

Copyright of Leukemia & Lymphoma is the property of Taylor & Francis Ltd and its content may not be copied or emailed to multiple sites or posted to a listserv without the copyright holder's express written permission. However, users may print, download, or email articles for individual use.
